# Supplementary material for: Bayesian multiple logistic regression for case-control GWAS
Source: PubMed Central journal article supplement (PMC6329526; doi:10.1371/journal.pgen.1007856), 2018-12-31
Supplement: pgen.1007856.s005.pdf [file pgen.1007856.s005.pdf]

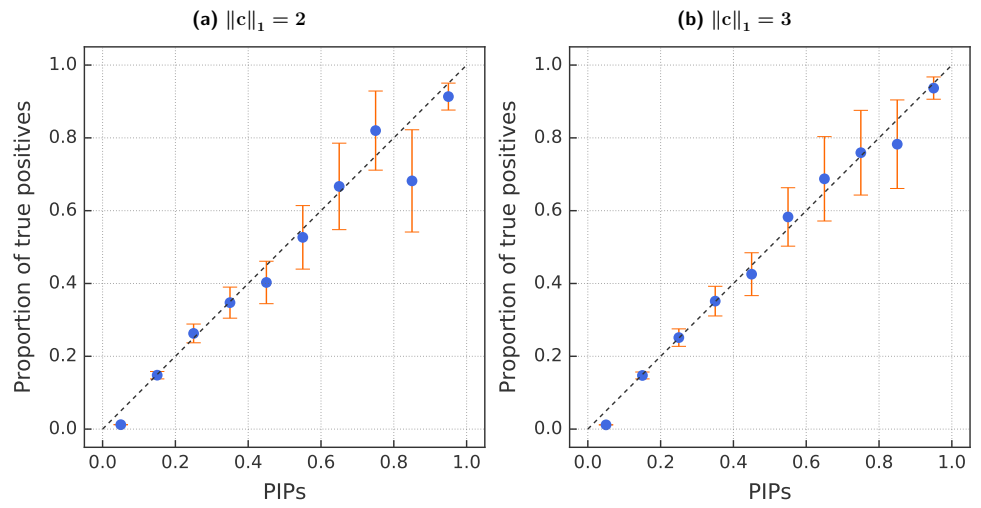

**Figure S4. Calibration of the posterior inclusion probabilities from B-LORE.** The SNPs were put into 10 bins of width 0.1 according to their posterior inclusion probabilities (PIPs). Each point on the plot represents a single bin, with the center of the PIP within that bin on the  $x$ -axis and the proportion of SNPs which were true positives in that bin on the  $y$ -axis. Vertical bars show  $\pm 2$  standard errors of the proportions, assuming a binomial distribution. Panel (a) is the result of B-LORE using maximum of 2 causal SNPs and panel (b) using maximum of 3 causal SNPs.
