# Supplementary material for: Bayesian multiple logistic regression for case-control GWAS
Source: PubMed Central journal article supplement (PMC6329526; doi:10.1371/journal.pgen.1007856), 2018-12-31
Supplement: pgen.1007856.s007.pdf [file pgen.1007856.s007.pdf]

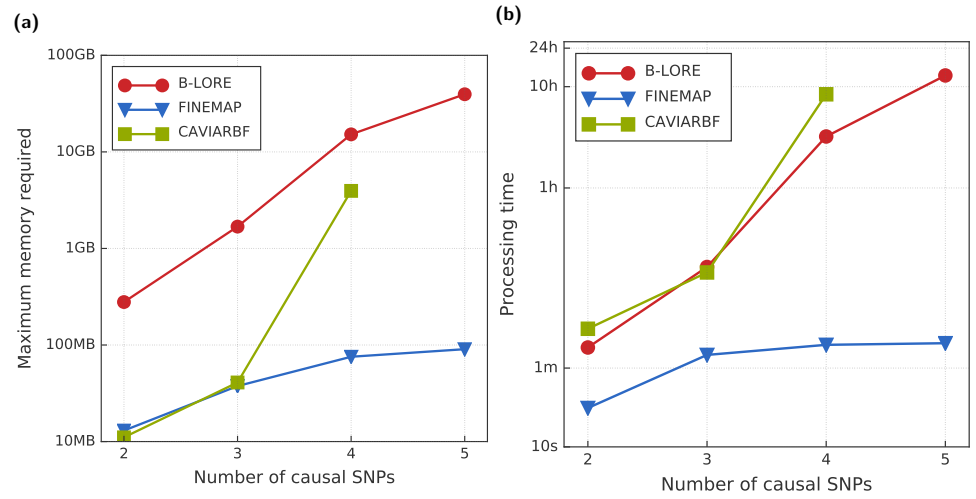

**Figure S6. CPU time and memory requirement for meta-analysis with B-LORE.** We compared the computational requirements of B-LORE with other finemapping methods in terms of (a) processing time and (b) maximum memory required. Along the  $x$ -axis, we vary the number of maximum allowed causal SNPs. For each point on the plot, we used an average over 20 simulations. Each simulation was a meta-analysis of 5 GWA studies with 40000 SNPs (distributed over 200 loci). All calculations were done on an Intel Xeon E5-2670 v2 processor with 8 cores. FINEMAP and CAVIARBF were allowed to use all the cores in parallel, by analyzing 25 loci in each core.
