# Supplementary material for: Bayesian multiple logistic regression for case-control GWAS
Source: PubMed Central journal article supplement (PMC6329526; doi:10.1371/journal.pgen.1007856), 2018-12-31
Supplement: pgen.1007856.s008.pdf [file pgen.1007856.s008.pdf]

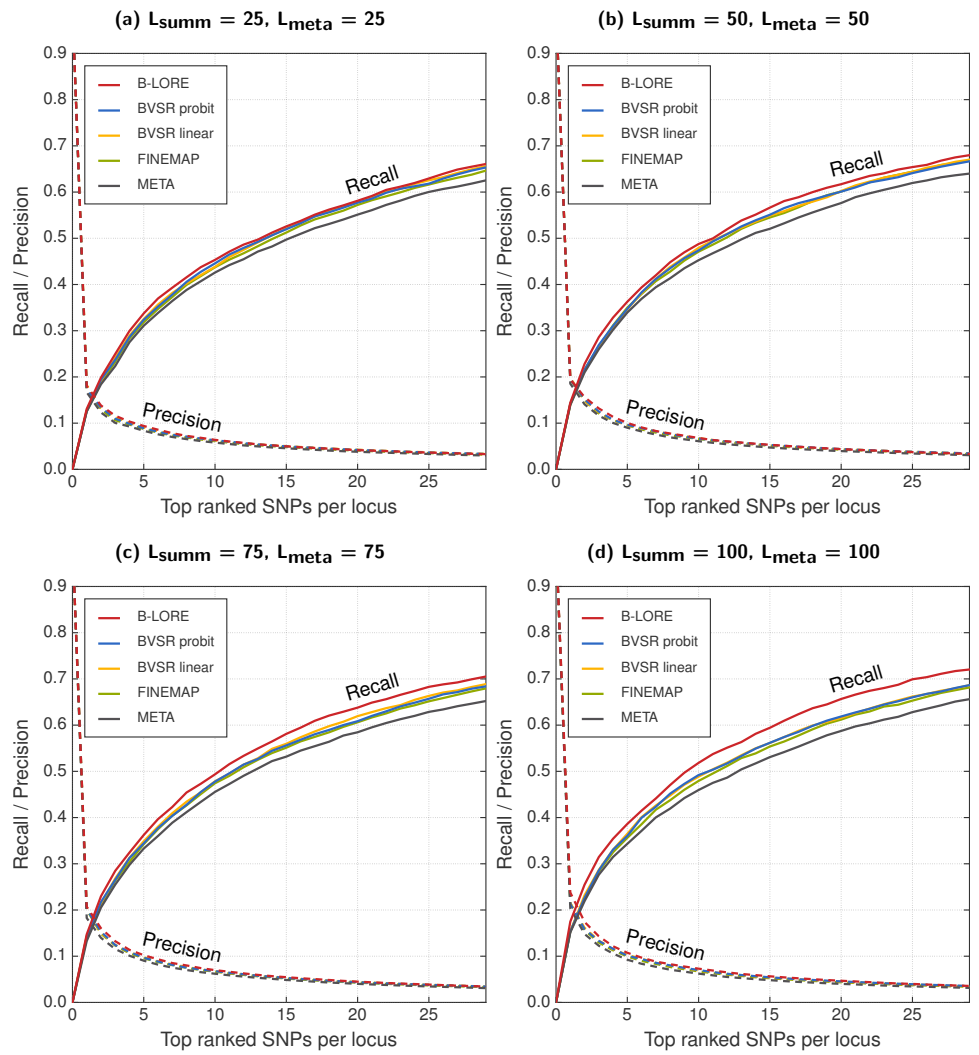

**Figure S7. Impact of number of loci on calculation of B-LORE summary statistics.** We simulated 13082 phenotypes using 100 loci of  $\sim 200$  SNPs, as described in the main text. All simulations used  $h_g^2 = 0.6$ . We then used only a subset (25, 50, 75 and 100) of these loci for further analysis, and the results are shown in panels (a), (b), (c) and (d) respectively. Here,  $L_{\text{summ}}$  denotes the number of loci used for calculating summary statistics and  $L_{\text{meta}}$  denotes the number of loci used for metaanalysis. We compared the ranking of SNPs at each locus using recall (solid lines, left y-axis) and precision (dotted lines, right y-axis), which were averaged over the loci and the simulation replicates. All methods were run with a maximum of two causal SNPs per locus.
